# Supplementary material
Source: PubMed Central journal article supplement (PMC7488285)
Supplement: ml0c00126_si_001.pdf [file ml0c00126_si_001.pdf]

## Supplementary Information

### Identification of Novel Rho-Kinase-II Inhibitors with Vasodilatory Activity

Seema Kesar,<sup>‡</sup> Sarvesh Paliwal,<sup>‡,\*</sup> Pooja Mishra<sup>‡</sup>, Kirtika Madan<sup>‡</sup>, Monika Chauhan<sup>‡</sup>, Neha Chauhan,<sup>‡</sup> Kanika Verma<sup>‡</sup>, and Swapnil Sharma<sup>‡</sup>

<sup>‡</sup>Department of Pharmacy, Banasthali Vidyapith, P. O. Banasthali-304022, Rajasthan, India.

\*Corresponding Author, Prof. Sarvesh Paliwal, Department of Pharmacy, Banasthali Vidyapith, Banasthali-304022, Rajasthan

Email: [paliwalsarvesh@yahoo.com](mailto:paliwalsarvesh@yahoo.com), [psarvesh@banasthali.ac.in](mailto:psarvesh@banasthali.ac.in).

### List of Contents

|                                                                                                             |                 |
|-------------------------------------------------------------------------------------------------------------|-----------------|
| 1. Data set for QSAR model development.....                                                                 | <b>pgno#2-6</b> |
| 2. Table of best 10 pharmacophore hypothesis generations.....                                               | <b>pgno#7</b>   |
| 3. Results of various parameters calculated during Güner-Henry scoring.....                                 | <b>pgno#7</b>   |
| 4. List of selected hits from NCI database.....                                                             | <b>pgno#7-8</b> |
| 5. Experimental and predicted activity values of training set and test set compounds.....                   | <b>pgno#8</b>   |
| 6. Docking poses of all the three hits and standard drug captured from the Discovery Studio 2.0 itself..... | <b>pgno#9</b>   |

**Table S1. Data set of urea based derivatives used for QSAR model development**

| S.No. | Name of the compound | Structure | IC <sub>50</sub> (nM) |
|-------|----------------------|-----------|-----------------------|
| 1     | 5a                   |           | 304                   |
| 2     | 5b                   |           | 18                    |
| 3     | 5c                   |           | 88                    |
| 4     | 5d                   |           | 1017                  |
| 5     | 5e                   |           | 7                     |
| 6     | 5f                   |           | 55                    |
| 7     | 5g                   |           | 24                    |
| 8     | 5h                   |           | 280                   |
| 9     | 5i                   |           | 751                   |

|    |    |  |     |
|----|----|--|-----|
| 10 | 5j |  | 2   |
| 11 | 5k |  | 253 |
| 12 | 5l |  | 331 |
| 13 | 5m |  | 570 |
| 14 | 5n |  | 924 |
| 15 | 5o |  | 425 |
| 16 | 5p |  | 281 |
| 17 | 5q |  | 357 |
| 18 | 8a |  | 87  |
| 19 | 8b |  | 611 |

|    |     |                                                                                      |      |
|----|-----|--------------------------------------------------------------------------------------|------|
| 20 | 8c  | 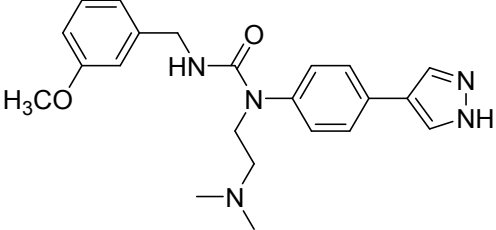   | 2984 |
| 21 | 8e  |    | 3324 |
| 22 | 12a |    | 1    |
| 23 | 12b |   | 1    |
| 24 | 12c |  | 1    |
| 25 | 12d |  | 3    |
| 26 | 12e |  | 1    |
| 27 | 12f |  | 17   |

|    |     |                                                                                      |    |
|----|-----|--------------------------------------------------------------------------------------|----|
| 28 | 12h | 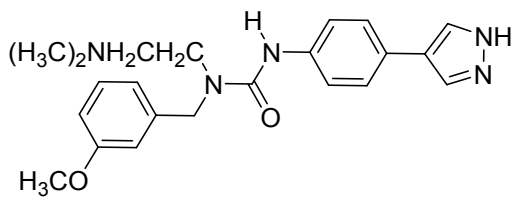   | 1  |
| 29 | 12i |    | 3  |
| 30 | 12j |    | 5  |
| 31 | 12k |   | 13 |
| 32 | 12l |  | 4  |
| 33 | 12m |  | 5  |

|    |     |                                                                                      |    |
|----|-----|--------------------------------------------------------------------------------------|----|
| 34 | 12n | 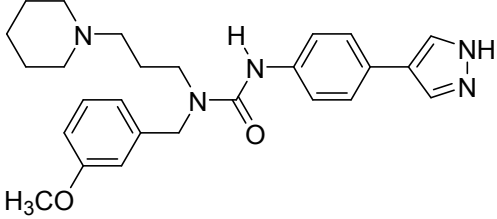   | 4  |
| 35 | 12o |    | 12 |
| 36 | 12p |    | 14 |
| 37 | 14a |    | 2  |
| 38 | 14b |   | 2  |
| 39 | 14c |  | 1  |
| 40 | 14d |  | 2  |
| 41 | 14e |  | 2  |

**Table S2. Statistical results of the best 10 pharmacophore hypothesis generations**

| Hypo | RMSD | Correlation | Weight | Configuration | Feature              |
|------|------|-------------|--------|---------------|----------------------|
| 1    | 0.98 | 0.90        | 2.56   | 14.93         | 2HBA 1HY<br>1HBD     |
| 2    | 1.43 | 0.79        | 1.74   | 14.93         | 2HBD 1HY<br>1HBA     |
| 3    | 1.34 | 0.83        | 6.69   | 14.93         | 2HBA 1HY<br>1HBD     |
| 4    | 1.48 | 0.76        | 1.56   | 14.93         | 1HBA 1HBD<br>1HY 1RA |
| 5    | 1.53 | 0.75        | 1.92   | 14.93         | 1HBA 1HBD<br>1HY 1RA |
| 6    | 1.55 | 0.74        | 1.17   | 14.93         | 1HBA 2HBD<br>1HY     |
| 7    | 1.57 | 0.73        | 1.27   | 14.93         | 1HBA 1HBD<br>1HY 1RA |
| 8    | 1.57 | 0.73        | 1.12   | 14.93         | 1HBA 1HBD<br>1HY 1RA |
| 9    | 1.60 | 0.72        | 1.15   | 14.93         | 2HBA 1HY<br>1HBD     |
| 10   | 1.62 | 0.71        | 1.14   | 14.93         | 1HBA 1HBD<br>1HY 1RA |

**Table S3. Results of various parameters calculated during Güner-Henry scoring**

| S. No. | Parameter                                             | ROCK-II inhibitors |
|--------|-------------------------------------------------------|--------------------|
| 1      | Total molecules in database (D)                       | 440                |
| 2      | Total number of actives in database (A)               | 360                |
| 3      | Total hits (Ht)                                       | 318                |
| 4      | Active hits (Ha)                                      | 298                |
| 5      | %Yield of actives $[(Ha/Ht) \times 100]$              | 94                 |
| 6      | Enrichment factor (E) $[(Ha \times D)/(Ht \times A)]$ | 0.77               |
| 7      | False positives (Ht-Ha)                               | 20                 |
| 8      | Goodness of hit score                                 | 0.68               |

**Table S4. List of selected hits from NCI database**

| S. No. | Name of hits | Estimated Value (nm) | Fit Value |
|--------|--------------|----------------------|-----------|
| 1      | NSC 2888     | 4.67                 | 8.29      |
| 2      | NSC 4231     | 4.68                 | 8.31      |
| 3      | NSC 2488     | 12.31                | 7.87      |

|   |          |       |      |
|---|----------|-------|------|
| 4 | NSC 3597 | 15.37 | 7.77 |
| 5 | NSC 2101 | 19.11 | 7.67 |
| 6 | NSC 3837 | 19.15 | 7.66 |
| 7 | NSC 3596 | 20.02 | 7.65 |

**Table S5. Experimental and predicted activity values of training set and test set compounds**

| Compound name | Experimental activities | Predicted activities |
|---------------|-------------------------|----------------------|
| 1             | 304                     | 160.49               |
| 2             | 18                      | 79.16                |
| 5             | 7                       | 55.98                |
| 7             | 24                      | 59.15                |
| 8             | 280                     | 101.70               |
| 10            | 2                       | 6.85                 |
| 11            | 253                     | 110.02               |
| 12            | 331                     | 72.70                |
| 13            | 570                     | 92.29                |
| 15            | 425                     | 81                   |
| 16            | 281                     | 35.72                |
| 19            | 611                     | 382.26               |
| 20            | 2984                    | 2797.13              |
| 21            | 3324                    | 5993.95              |
| 25            | 3                       | 7.38                 |
| 26            | 1                       | 5.10                 |
| 27            | 17                      | 8.49                 |
| 28            | 1                       | 0.54                 |
| 29            | 3                       | 2.59                 |
| 31            | 13                      | 18.56                |
| 32            | 4                       | 7.48                 |
| 33            | 5                       | 5.17                 |
| 34            | 4                       | 3.68                 |
| 36            | 14                      | 34.61                |
| 37            | 2                       | 6.85                 |
| 39            | 1                       | 1.46                 |
| 40            | 2                       | 5.10                 |
| 5c*           | 88                      | 59.21                |
| 5d*           | 1017                    | 70.92                |
| 5f*           | 55                      | 59.77                |
| 5i*           | 751                     | 65.64                |
| 5n*           | 924                     | 122.16               |
| 5q*           | 357                     | 63.36                |
| 12a*          | 1                       | 14.71                |
| 12o*          | 12                      | 37.63                |
| 14a*          | 2                       | 6.58                 |
| 14b*          | 2                       | 2.77                 |



---

\*Test set Compounds

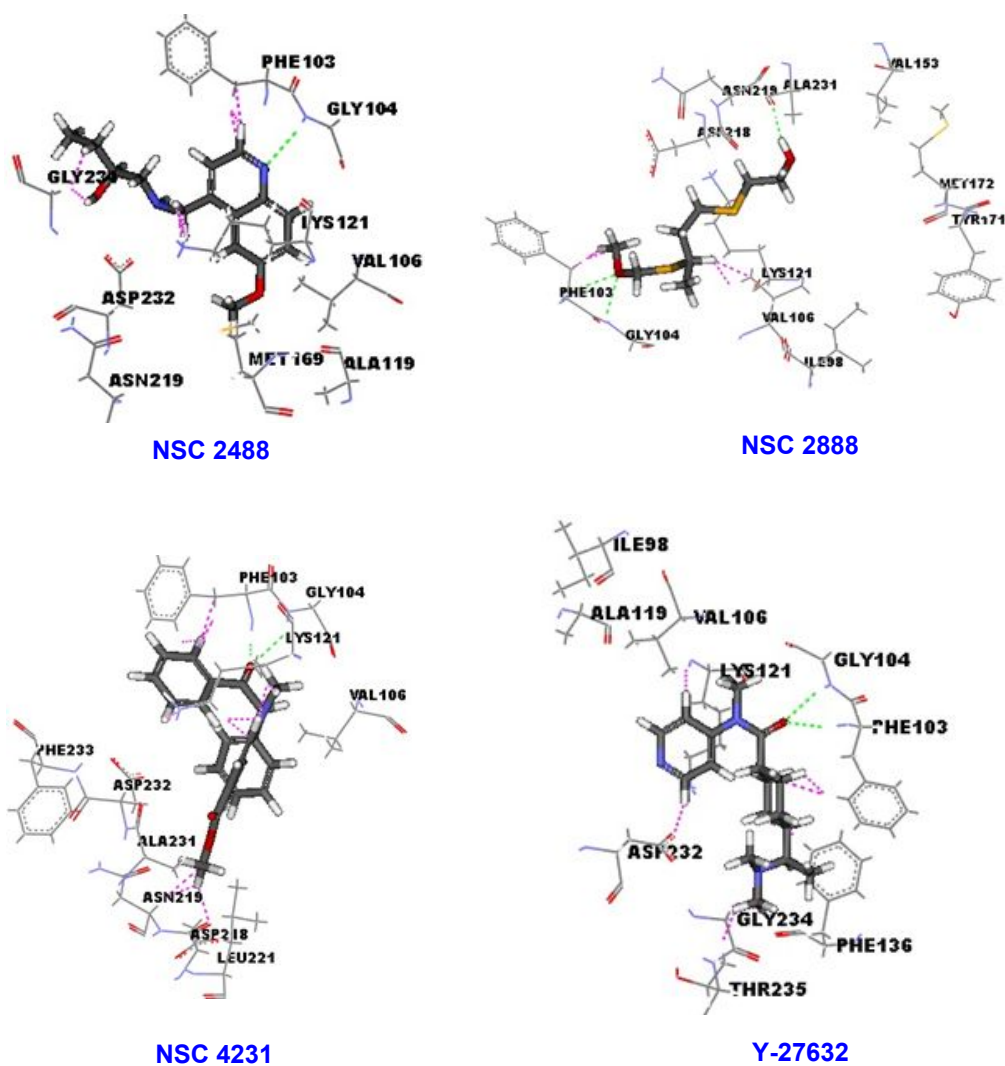

**Figure S1.** Docked conformations of NCI hits and the standard drug on the active site of Rho-kinase. Green dotted lines characterize hydrogen binding interaction. Pink dotted lines represent Van der Waals interaction and some of the amino acids around the structure created hydrophobic environment.
